# Supplementary material for: Single Ni sites distributed on N-doped carbon for selective hydrogenation of acetylene
Source: Royal Society of Chemistry journal article supplement (doi:10.1039/c7cc04820c), 2017-01-01
Supplement: c7cc04820c1.pdf [file c7cc04820c1.pdf]

# **Single Ni Sites Distributing on N-doped Carbon for Selective Hydrogenation of Acetylene**

**Xinyao Dai, Zheng Chen, Tao Yao, Lirong Zheng, Yue Lin, Wei Liu, Huanxin Ju,  
Junfa Zhu, Xun Hong, Shiqiang Wei, Yuen Wu,\* Yadong Li**

## **Table of contents**

- 1. Materials and Methods**
- 2. Supplementary Figures and Tables**
- 3. Author Contributions**

## **1. Materials and Methods:**

### **Synthesis Ni SAs/N-C**

In a typical procedure,  $\text{Ni}(\text{NO}_3)_2 \cdot 6\text{H}_2\text{O}$  (0.3g) and  $\text{Zn}(\text{NO}_3)_2 \cdot 6\text{H}_2\text{O}$  (0.3g) was dissolved in methanol (15mL) to form a clear solution. Then the solution was injected into 15mL of methanol containing 1g 2-methylimidazole (MeIM) under ultrasound for 20min at room temperature. The precipitates were washed with ethanol three times and dried in vacuum at 80°C for overnight. The powder was placed in a furnace and then heated to the desired temperature (700 °C) at the rate of 5 °C /min for 3 h under  $\text{N}_2$  gas and then cooled to room temperature to get the representative samples.

### **Synthesis Ni SAs/N-C 700, Ni SAs/N-C 800, and Ni SAs/N-C 900**

In a typical procedure,  $\text{Ni}(\text{NO}_3)_2 \cdot 6\text{H}_2\text{O}$  (0.3g) and  $\text{Zn}(\text{NO}_3)_2 \cdot 6\text{H}_2\text{O}$  (0.3g) was dissolved in methanol (15mL) to form a clear solution. Then the solution was injected into 15mL of methanol containing 1g 2-methylimidazole (MeIM) under ultrasound for 20min at room temperature. The precipitates were washed with ethanol three times and dried in vacuum at 80°C for overnight. The powder was placed in a furnace and then heated to the desired temperature (700, 800 and 900 °C) at the rate of 5 °C /min for 3 h under  $\text{N}_2$  gas and then cooled to room temperature to get the representative samples.

### **Synthesis of Ni NPs/N-C**

In a typical procedure,  $\text{Ni}(\text{NO}_3)_2 \cdot 6\text{H}_2\text{O}$  (0.53g) and  $\text{Zn}(\text{NO}_3)_2 \cdot 6\text{H}_2\text{O}$  (0.06g) was dissolved in methanol (15mL) to form a clear solution. Then the solution was injected into 15mL of methanol containing 1g 2-methylimidazole (MeIM) under ultrasound for 20min at room temperature. The precipitates were washed with ethanol three times and dried in vacuum at 80°C for overnight. The powder was placed in a furnace and then heated to the 1000 °C at the rate of 5 °C /min for 3 h under  $\text{N}_2$  gas and then cooled to room temperature to get the representative samples.

### **The selective hydrogenation of acetylene.**

Catalyst was loaded in a microreactor. The feedstock was introduced into the reactor after it was cooled to room temperature. Acetylene (0.5%) was hydrogenated in admixture with ethylene (50%) and hydrogen (5%) over the catalyst. Aliquots were taken at specific time for determination of component concentrations by GC.

**Characterization:**

Powder X-ray diffraction patterns of samples were recorded on a Rigaku Miniflex-600 operating at 40 kV voltage and 15 mA current with CuK $\alpha$  radiation ( $\lambda=0.15406\text{nm}$ ). Transmission electron microscopy (TEM) was carried out by a JEM-2100F FETEM equipped with energy dispersive X-ray spectrometer (EDX) analyses at 100 kV, and the high-angle annular dark-field scanning TEM (HAADF-STEM), EDX elemental mapping were operated at 200 kV. The scanning electron microscope (SEM) was performed on JSM-6700F SEM. Fourier-transformed infrared resonance (FT-IR) spectra were obtained in transmission mode on a Nicolet 8700 FT-IR. Thermogravimetric analyses (TG and DTA) were carried out on a TA SDT Q600 thermal analyzer heating from room temperature to 1000 °C at the rate of 10 °C min<sup>-1</sup>. The obtained adsorption-desorption isotherms were evaluated to give the pore parameters including Brunauer-Emmett-Teller (BET) specific surface area and pore size. These were all performed on a Micromeritics Tristar II 3020M.

## 2. Supplementary Figures and Tables.

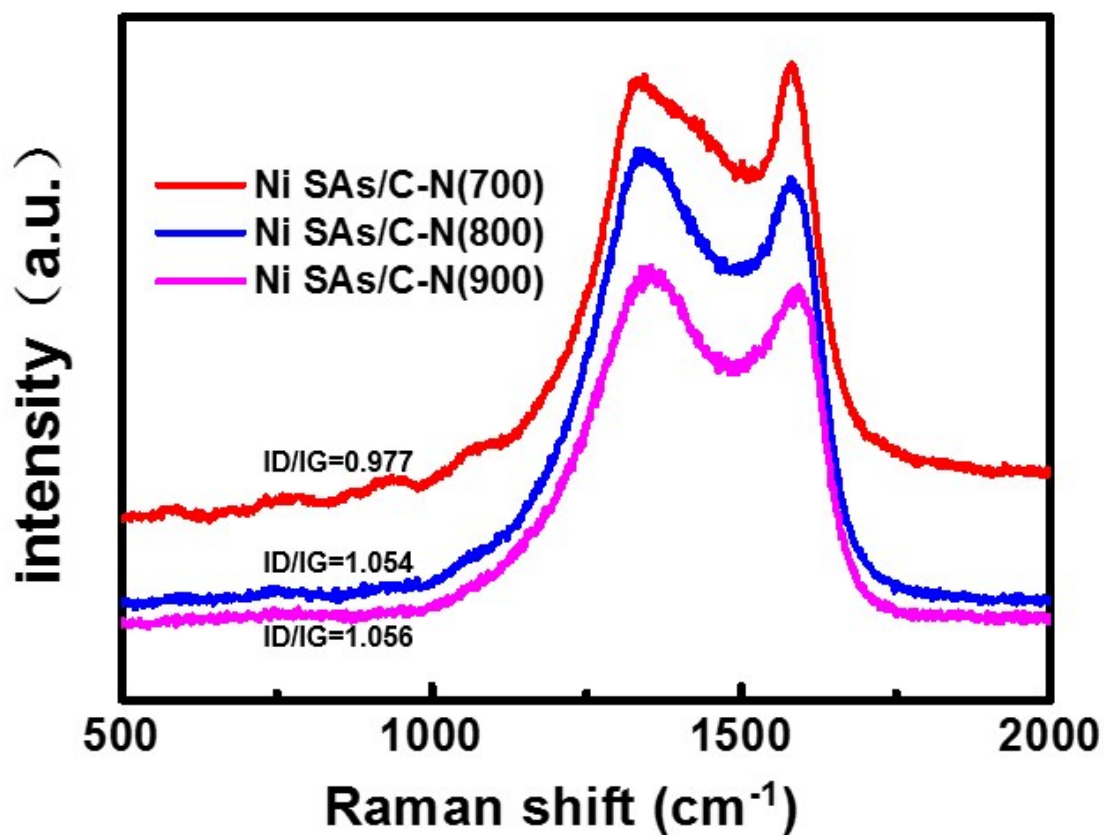

Fig. S1. Raman spectra for the pyrolyzed ZnNi-ZIF at 700, 800 and 900 °C, respectively.

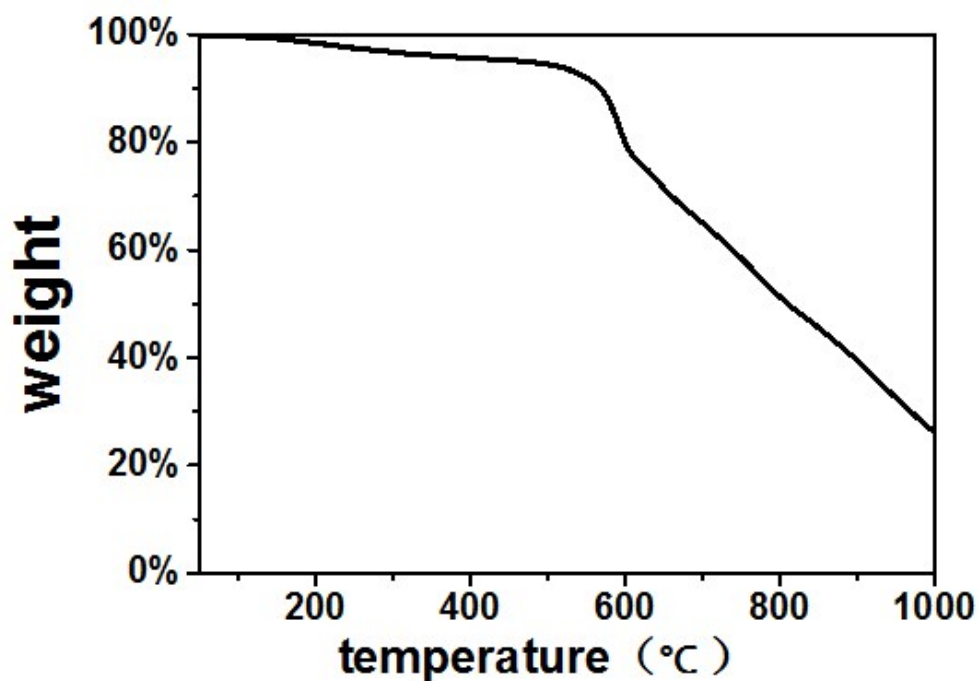

Fig. S2. TGA pattern of ZnNi-ZIF.

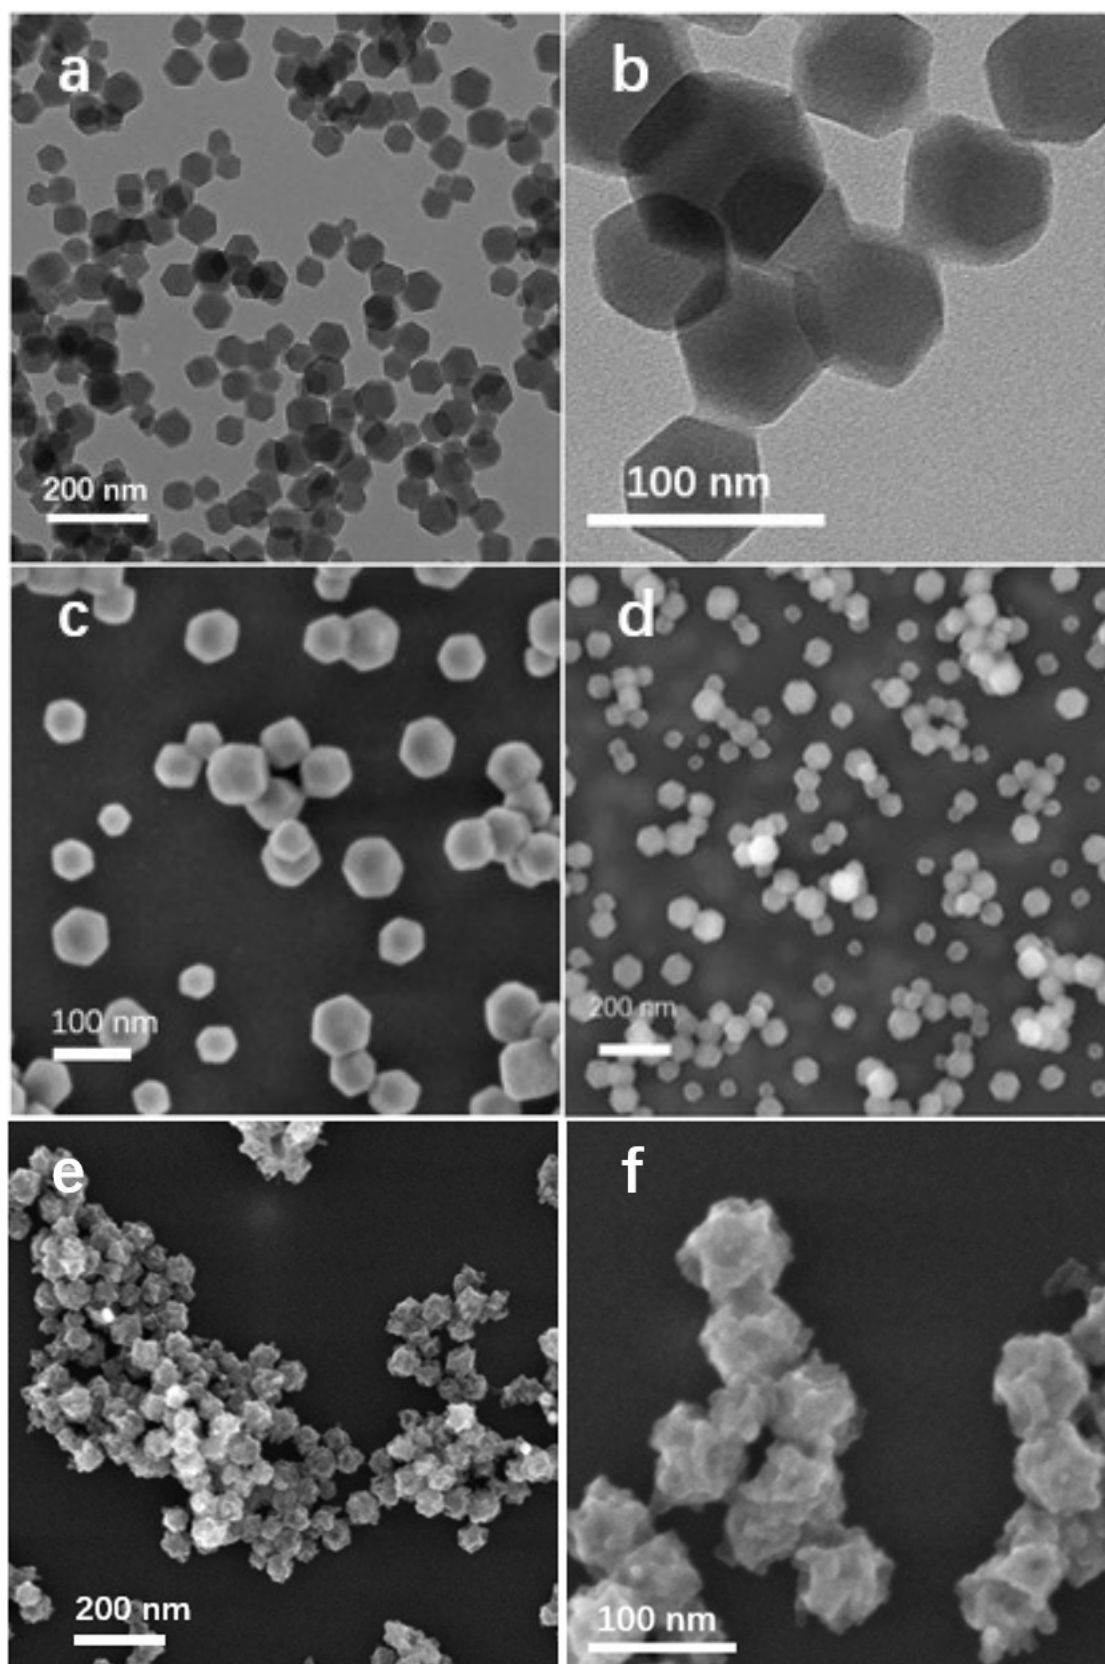

**Fig. S3** a,b) TEM image of ZnNi-ZIF, c,d) SEM image of ZnNi-ZIF ,e,f) SEM images of Ni SAs/N-C..

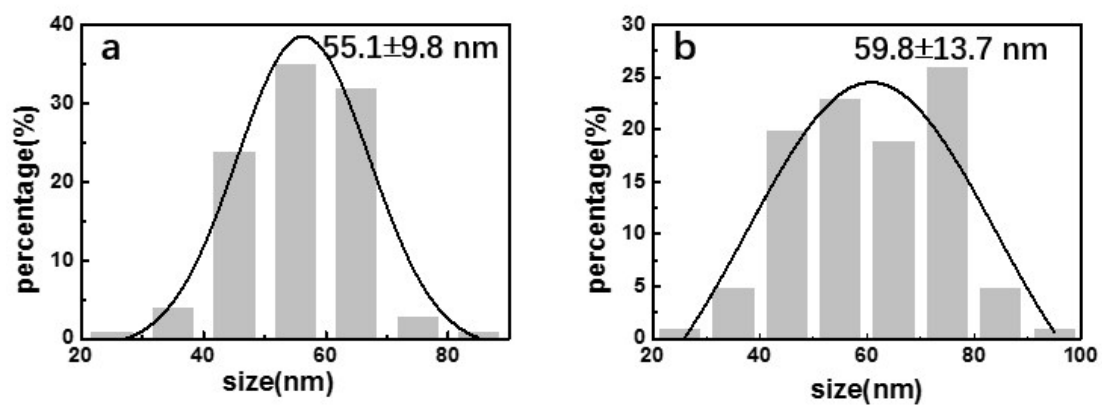

**Fig. S4** The histograms of size distribution of (a) Ni SAs/N-C and (b) ZnNi-ZIF.

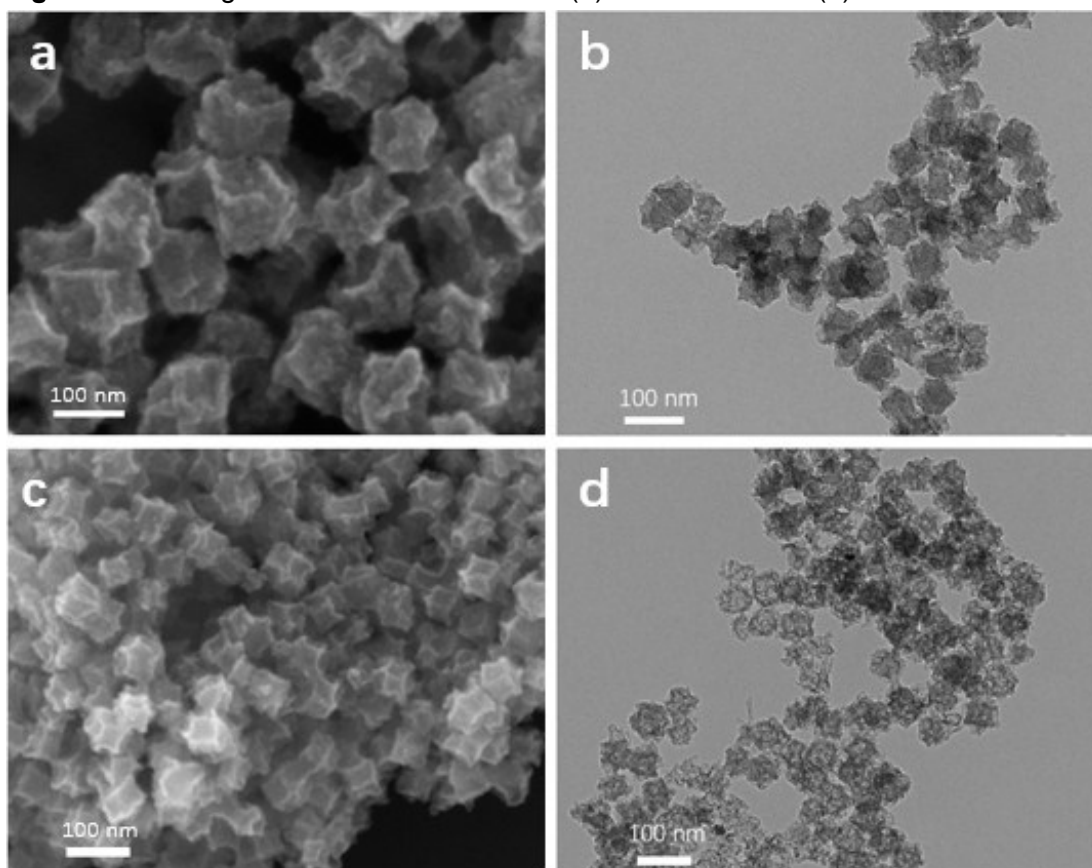

**Fig. S5.** a) SEM image, b) TEM image of Ni SAs/N-C 800, c) SEM image, d) TEM image of Ni SAs/N-C 900.

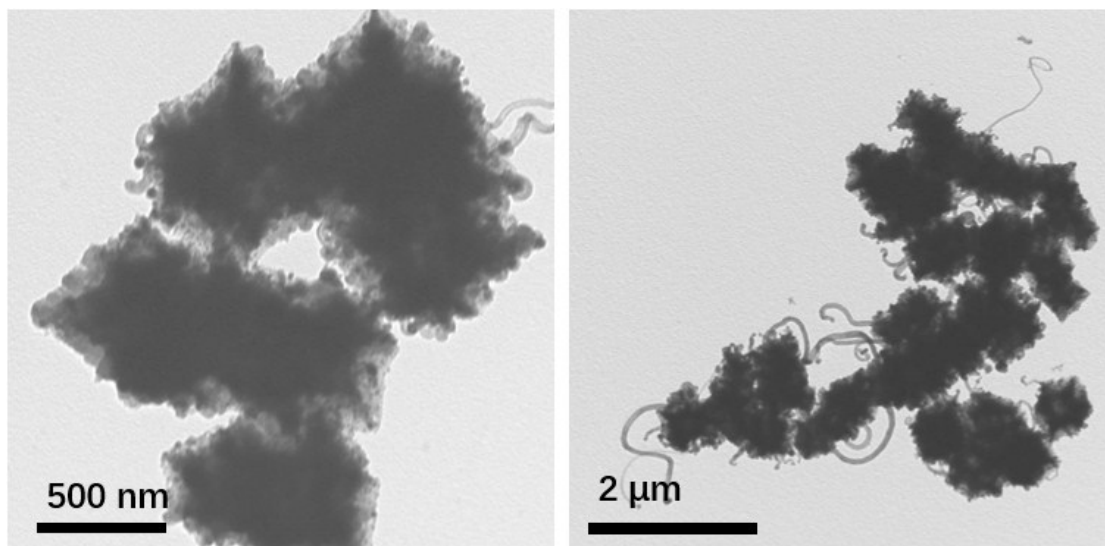

**Fig. S6.** TEM images of Ni NPs/N-C at different scale.

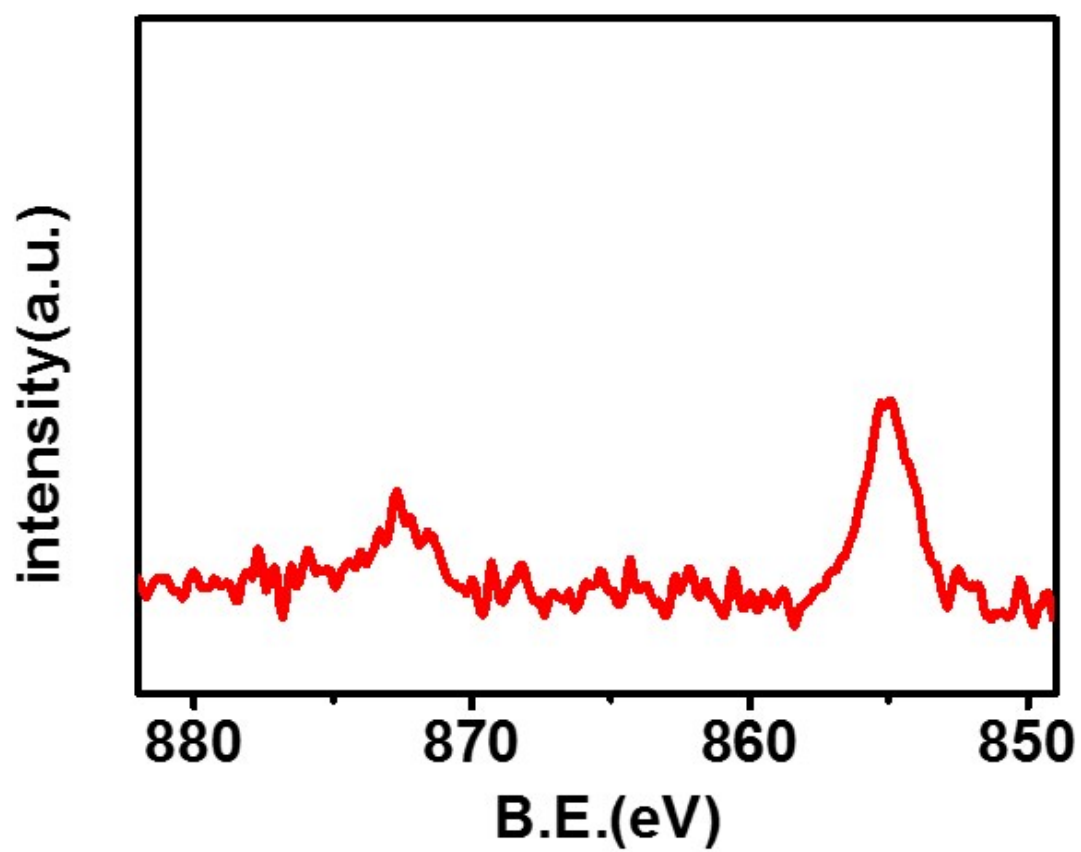

**Fig. S7.** Evolution of Ni 2p XPS of the Ni SAs/N-C.

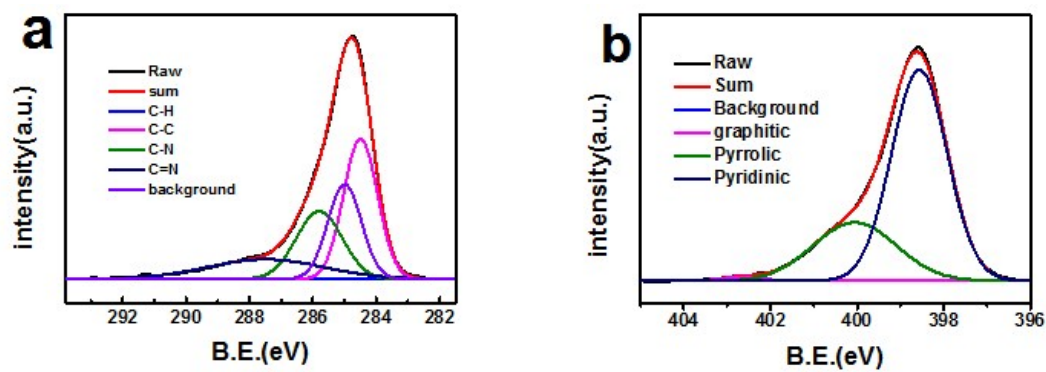

**Fig. S8.** XPS spectra for the (a) C 1s, (b) N 1s regions of Ni SAs/N-C.

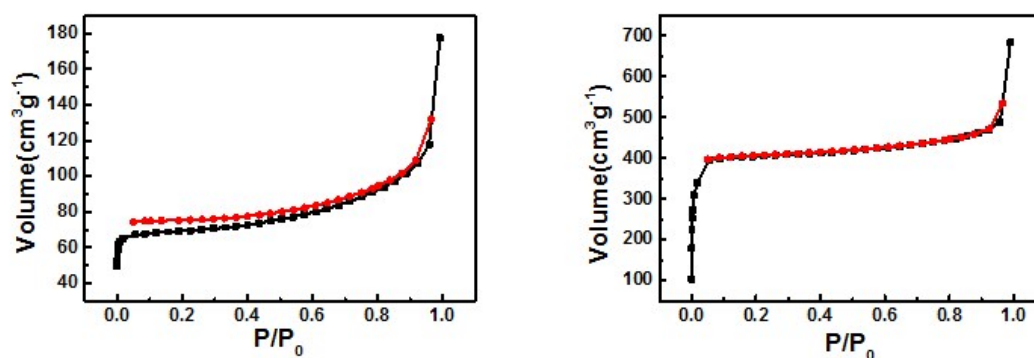

**Figure S9:** Nitrogen adsorption isotherm and desorption isotherm of Ni SAs/N-C and ZnNi-ZIF measured at 77 K.

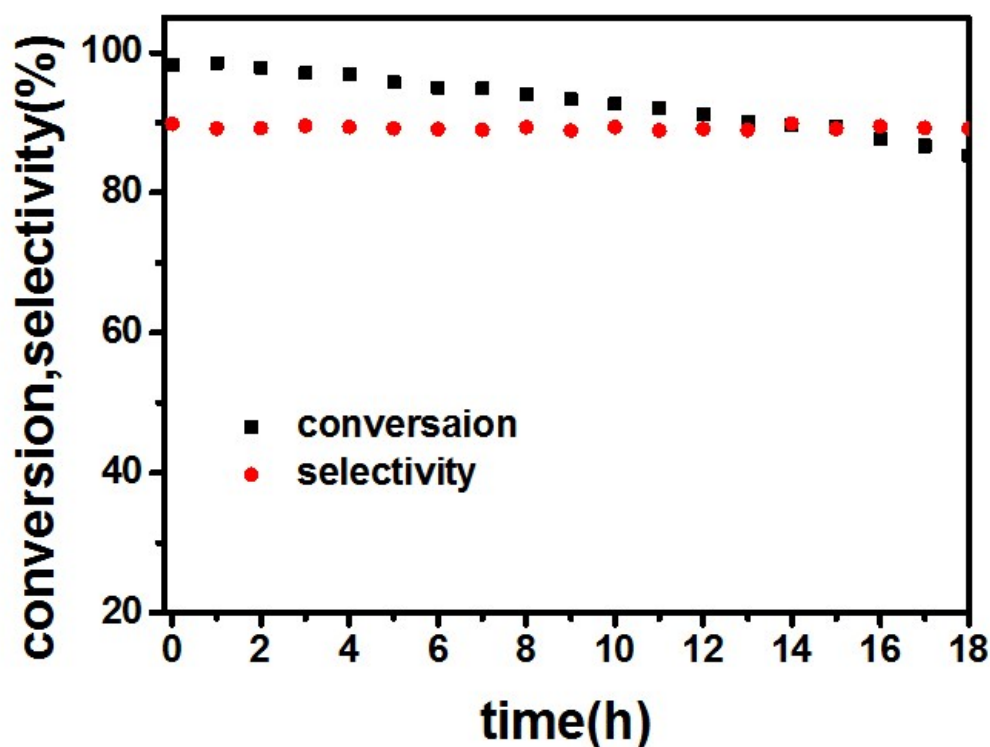

**Fig. S10:** Conversion and selectivity as a function of time on stream at 200 °C catalyzed by SAs/N-C.

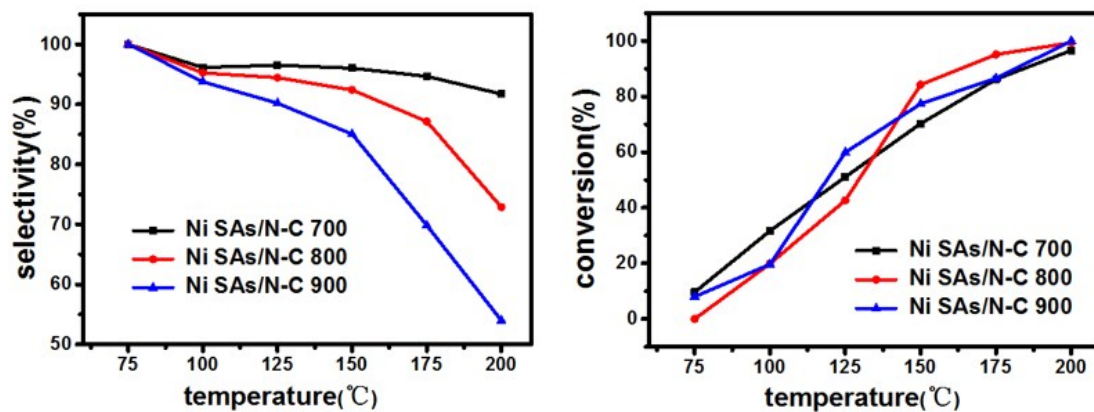

**Figure S11:** The selectivity and conversion to ethylene by Ni SAs/N-C with different pyrolysis temperature

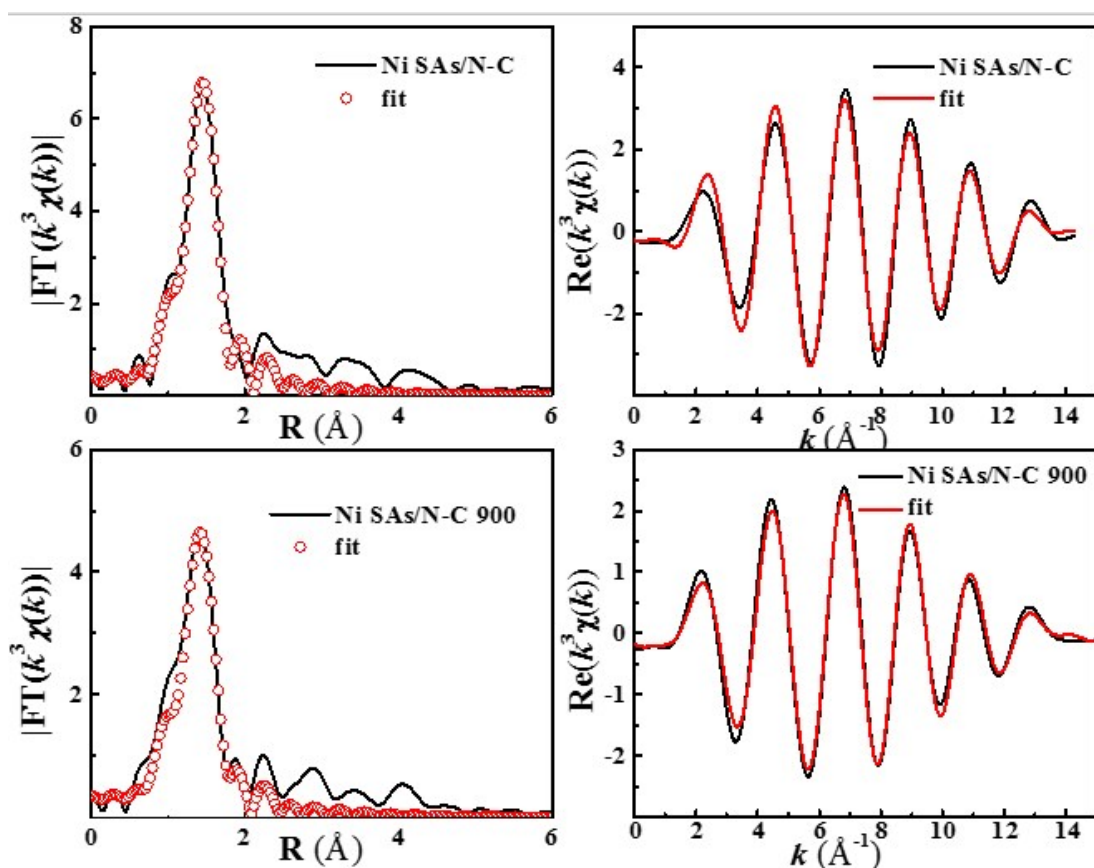

**Fig. S12:** The corresponding XAFS fitting curves of Ni SAs/N-C and Ni SAs/N-C 900.

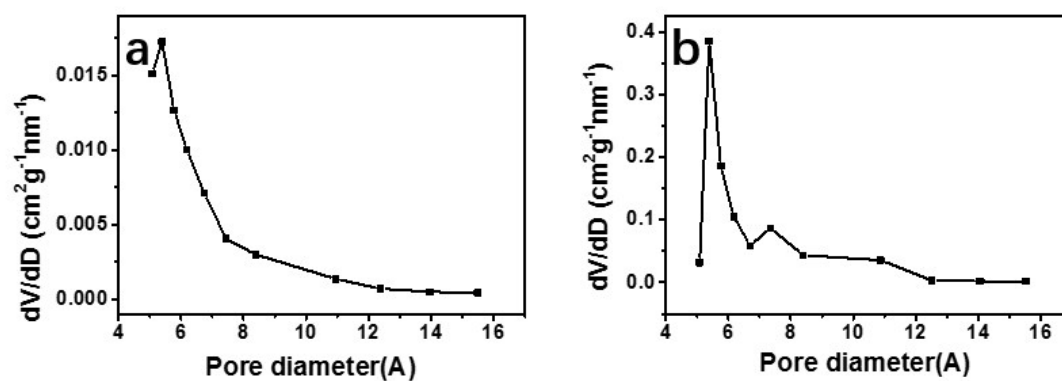

**Figure S13:** Pore diameter distribution for (a) Ni SAs/N-C and (b) ZnNi ZIF-8.

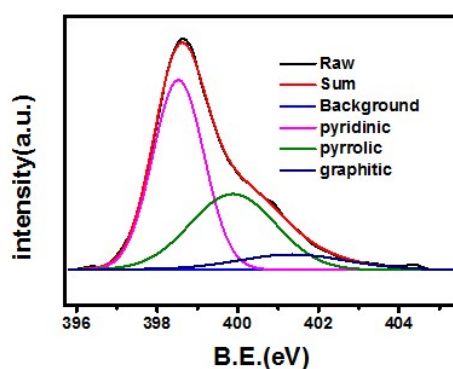

**Figure S14:** XPS spectra for the N 1s regions of Ni SAs/N-C 800.

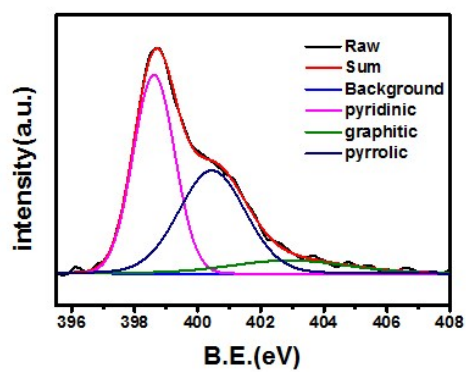

**Figure S15:** XPS spectra for the N 1s regions of Ni SAs/N-C 900.

**Table S1.** The BET Surface Area and Pore Diameter of Ni SAs/N-C and ZnNi-ZIF

| sample     | BET Surface Area(m <sup>2</sup> •g <sup>-1</sup> ) | Average pore diameter(Å) |
|------------|----------------------------------------------------|--------------------------|
| Ni SAs/N-C | 228.2903                                           | 6.48                     |
| ZnNi-ZIF   | 1227.7030                                          | 6.21                     |

**Table S2.** XAFS data fitting results of Ni SAs/N-C.

| Sample         | Path | N   | <i>R</i> (Å) | $\sigma^2$ (10 <sup>-3</sup> Å <sup>2</sup> ) | $\Delta E_0$ (eV) |
|----------------|------|-----|--------------|-----------------------------------------------|-------------------|
| Ni SAs/N-C     | Ni-N | 4.0 | 1.88         | 4.2                                           | -1.4              |
| Ni SAs/N-C 900 | Ni-N | 3.0 | 1.87         | 4.4                                           | -6.0              |

N, coordination number; *R*, distance between absorber and backscatter atoms;  $\sigma^2$ , the Debye-Waller factor value;  $\Delta E_0$  (eV), inner potential correction to account for the difference in the inner potential between the sample and the reference compound.
